# Supplementary material
Source: Springer Nature journal article supplement (https://www.springermedizin.de/resource/supplementary/13550_2013_177_MOESM5_ESM.pdf/9687748)
Supplement: MOESM5 [file 9687748]

**a**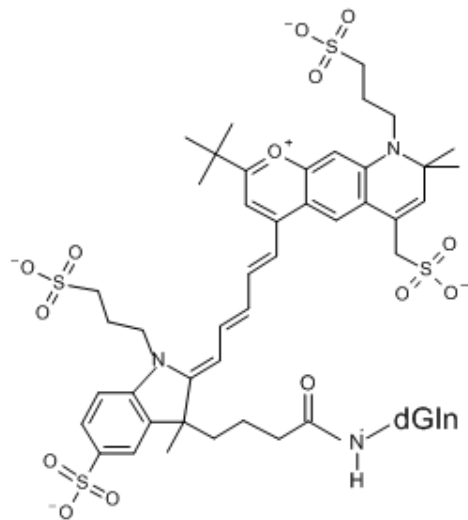**MW: 2611 g/mol****AlogP: -0.9729**dGln dGlu dGln dGlu dGln dGlu Ala Tyr Gly Trp Met Asp Phe NH<sub>2</sub>**b**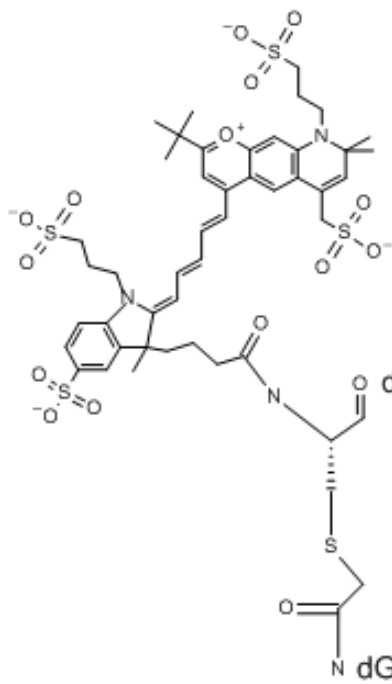**MW: 3598 g/mol****AlogP: -2.6092**dGln dGln dGln Ala Tyr Gly Trp Met Asp Phe-NH<sub>2</sub>N dGln dGln dGln Ala Tyr Gly Trp Met Asp Phe-NH<sub>2</sub>
